# Supplementary material for: Composition of Microbiota in Transient and Mature Human Milk: Significant Changes in Large for Gestational Age Group
Source: MDPI journal article supplement (doi:10.3390/nu16020208), 2024-01-09
Supplement: s1 [file s1]

**Supplementary Table S1.** Maternal age, maternal weight status, mode of delivery, gestational age, birth weight, gender, and human milk sampling time of entire study group and subgroups.

|          | Maternal Age (years) * | Maternal weight status (NW/OW) | Delivery Mode (SV/CS) | Gestational Age (weeks) * | Birth Weight (gram) * | Gender (Boys/Girls) | Infant Feeding EBF/MF | Transient HM Sampling Time (days) * | Mature HM Sampling Time (days) * |
|----------|------------------------|--------------------------------|-----------------------|---------------------------|-----------------------|---------------------|-----------------------|-------------------------------------|----------------------------------|
| Total    | 30                     |                                |                       | 38                        | 2840                  |                     |                       | 8                                   | 51.5                             |
| (n = 44) | (18–44)                | 35/9                           | 9/35                  | (32–41)                   | (1200–4600)           | 18/26               | 27/17                 | (7–14)                              | (45–70)                          |
| NS-T     | 33                     |                                |                       | 38.5                      | 3225                  |                     |                       | 12                                  | 53.5                             |
| (n = 8)  | (20–41)                | 6/2                            | 8/0                   | (37–40)                   | (2880–3600)           | 1/7                 | 5/3                   | (8–14)                              | (47–70)                          |
| CS-T     | 35                     |                                |                       | 38                        | 3080                  |                     |                       | 8                                   | 55                               |
| (n = 9)  | (25–44)                | 7/2                            | 0/9                   | (37–41)                   | (2730–3600)           | 3/6                 | 6/3                   | (7–13)                              | (45–70)                          |
| PT       | 30                     |                                |                       | 35                        | 2255                  |                     |                       | 8                                   | 50                               |
| (n = 13) | (18–43)                | 11/2                           | 0/13                  | (32–37)                   | (1200–2700)           | 5/8                 | 6/7                   | (7–14)                              | (45–62)                          |
| SGA      | 34                     |                                |                       | 37                        | 2225                  |                     |                       | 8                                   | 49                               |
| (n = 7)  | (22–38)                | 6/1                            | 1/6                   | (34–41)                   | (1670–2500)           | 3/4                 | 4/3                   | (7–12)                              | (45–63)                          |
| LGA      | 30                     |                                |                       | 39                        | 4120                  |                     |                       | 8                                   | 51                               |
| (n = 7)  | (23–39)                | 5/2                            | 0/7                   | (37–41)                   | (3505–4600)           | 6/1                 | 6/1                   | (7–13)                              | (45–63)                          |

\* median (minimum–maximum). NS-T: normal spontaneous vaginal delivery-term; CS-T: cesarean delivery-term; PT: premature; SGA: small for gestational age; LGA: large for gestational age; SV: spontaneous vaginally; CS: cesarean delivery. Mothers were classified according to their pre-gestational BMI as normal weight (BMI 18.5–24.9 kg/m<sup>2</sup>) and overweight (BMI ≥25.0–29.9 kg/m<sup>2</sup>). EBF: exclusively breastfeeding MF (mixed feeding: breastfeeding and formula feeding).
